# Supplementary material for: A low temperature cluster condensation approach to CdS nanocrystals: oxidative aggregation of [Cd10S4Br4(SR)12]4? with sulfurElectronic supplementary information (ESI) available: X-ray powder, IR and 13C NMR spectra. See http://www.rsc.org/suppdata/cc/b3/b302266h/
Source: Royal Society of Chemistry journal article supplement (doi:10.1039/b302266h), 2003-01-01

# **A Low Temperature Cluster Condensation Approach to CdS Nanocrystals: Oxidative Aggregation of $[\text{Cd}_{10}\text{S}_4\text{Br}_4(\text{SR})_{12}]^{4-}$ with Sulfur**

**Frank E. Osterloh\*, Daniel P. Hewitt**

Department of Chemistry, University of California at Davis, Davis, California 95616.

E-mail: fosterloh@ucdavis.edu

## **Supporting Information (4 pages total)**

- a) X-ray Powder spectrum of CdS**
- b) IR spectra**
- c)  $^{113}\text{Cd}$  nmr spectra**

# Experimental and theoretical X-ray powder spectrum of crystalline CdS .

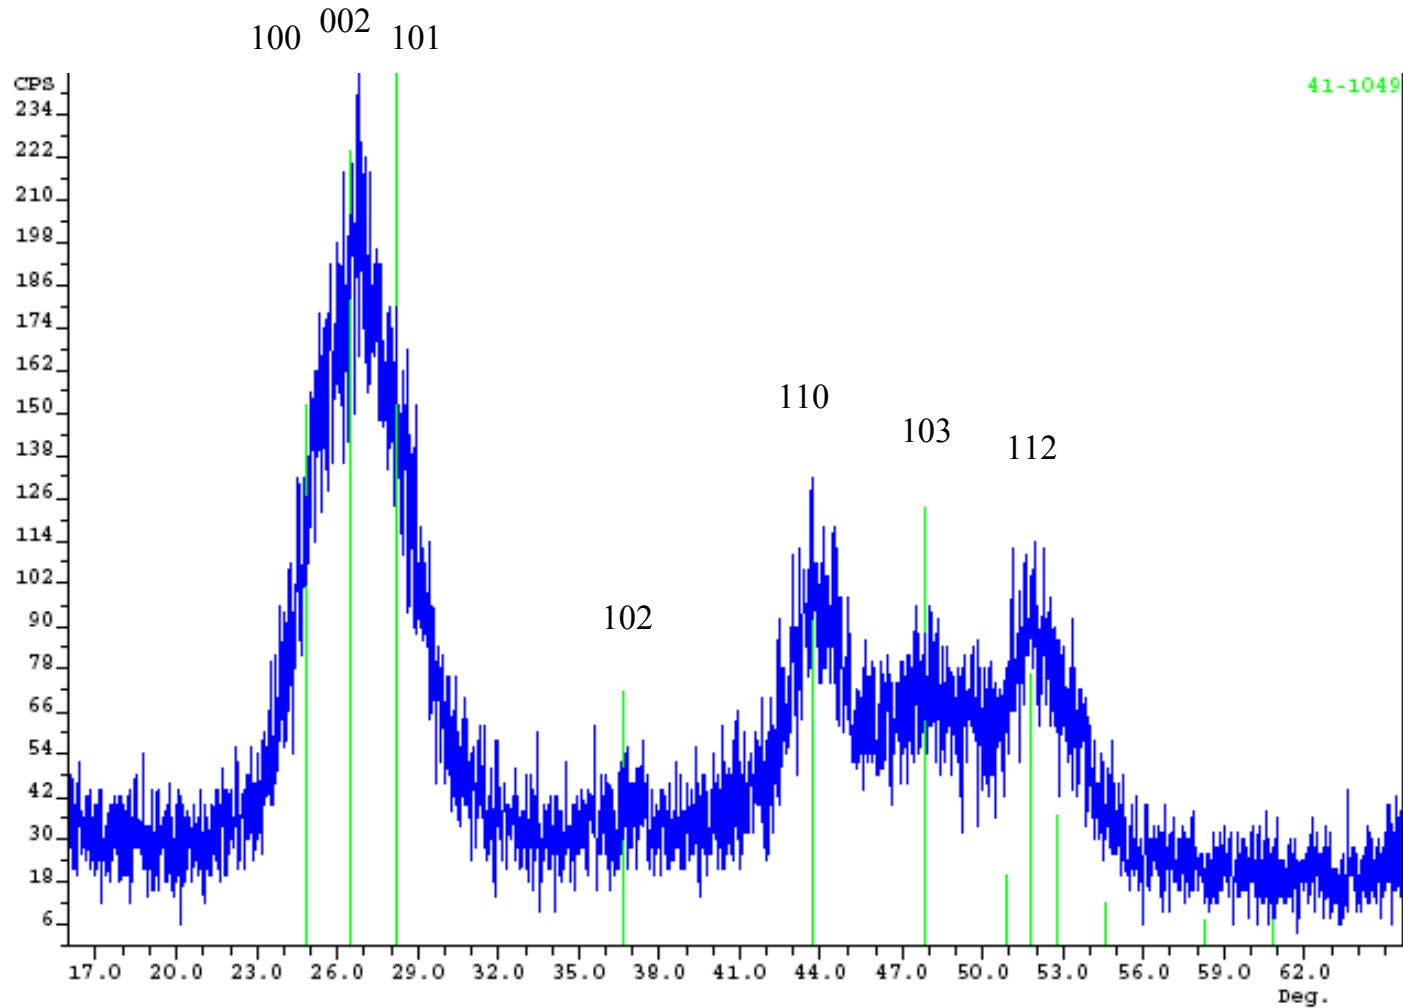

- Peak assignments based on wurtzite mineral (greenockite, jps card 41-1049)
- Cu K-alpha radiation.

IR spectra of a) thiocresol, b)  $(\text{Et}_4\text{N})_4[\text{Cd}_{10}\text{S}_4\text{Br}_4(\text{SR})_{12}]$ , c) DMF, d) CdS nanocrystals. All spectra were recorded as KBr pellets.

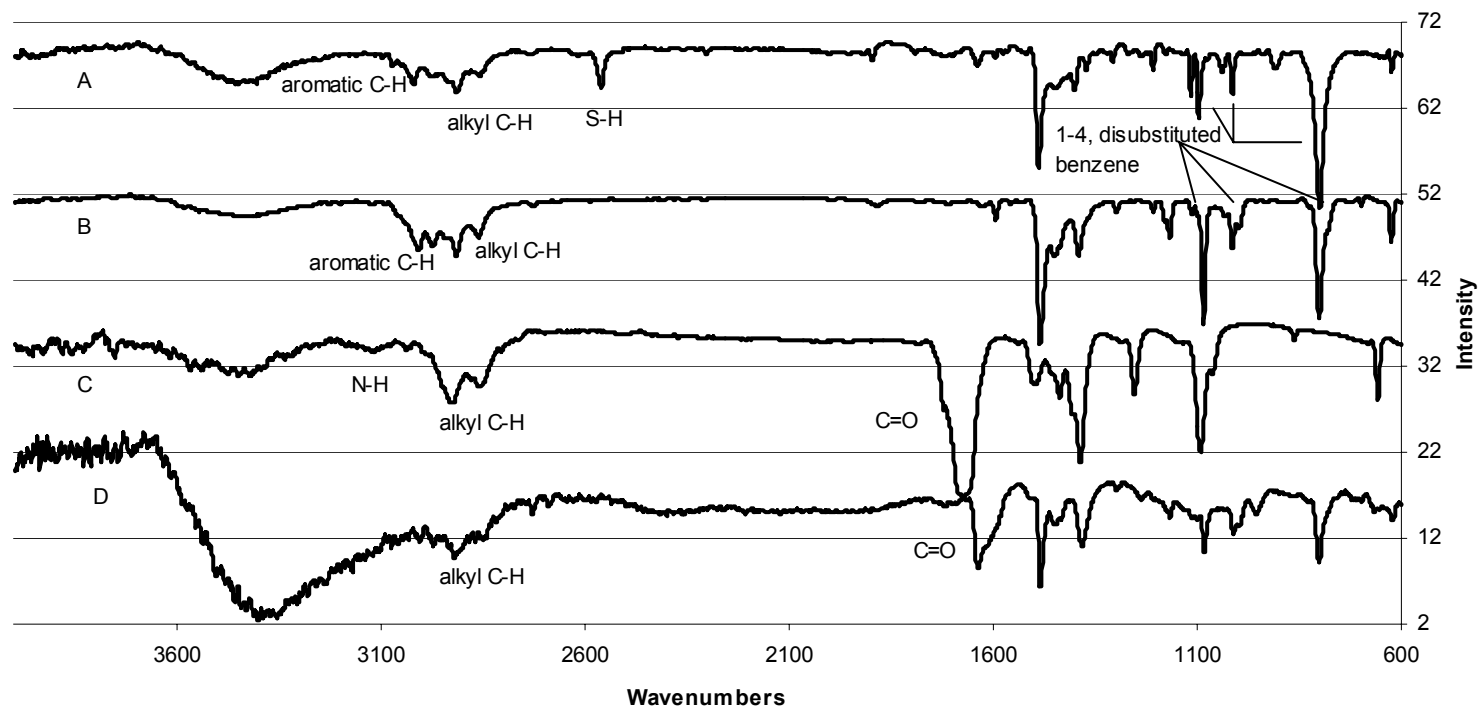

$^{113}\text{Cd}$ -nmr spectra of **1** before (a) and after heating (b). All spectra were recorded in  $\text{DMSO-d}_6$ .

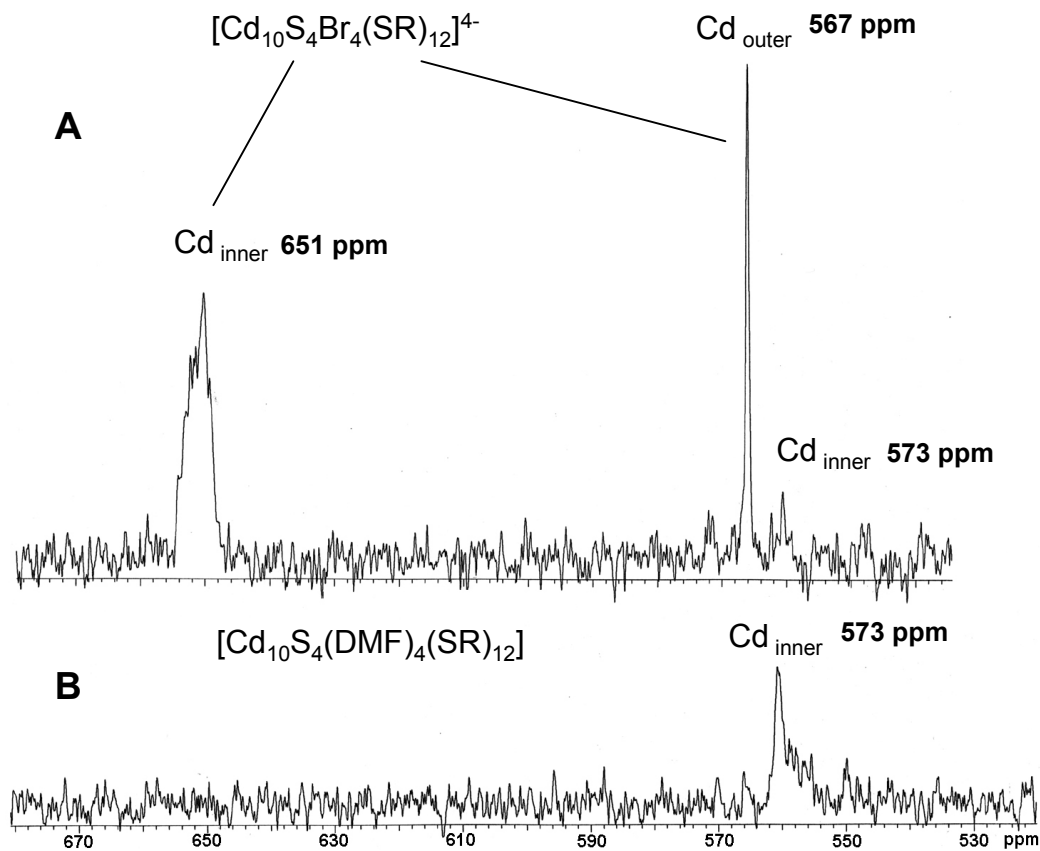

Supplement: b302266h.pdf [file b302266h.pdf]
